# Supplementary material
Source: ML conference proceedings conference paper supplement (https://openreview.net/forum?id=dHd6pU-8_fF)
Supplement: supplementary_material [file attachment]

## A EXPERIMENTATION

The following algorithm is used to run experiments on different datasets given in Section 4.

---

**Algorithm 3** Forward and backward pass of DNN for a single data-point

---

**Given** input  $(x, y)$ , weights (and biases)  $\Theta_l$  and activations  $\sigma_l$  where  $l \in [1, L]$  is the layer and  $L$  is the number of layers

$\mathbf{a}_0 = x$ ;

**for**  $l = 1, \dots, L$  **do**  $h_l = \Theta_l a_{l-1}; a_l = \sigma_l(h_l)$

**end for**

$\dot{a}_L \stackrel{\text{def}}{=} \nabla_z a_L \leftarrow \frac{\partial \mathcal{L}(z, y)}{\partial z} \Big|_{z=a_L}$

**for**  $l = 1, \dots, L$  **do**  $g_l = \dot{a}_l \odot \sigma'(h_l); \dot{\Theta}_l = g_l \hat{a}_{l-1}^\top; \dot{a}_{l-1} = \Theta_l^\top g_l$

**end for**

---

We present the learning rates for the different algorithms used in Table (4):

| Method        | Adam                 | SGD                  | Adagrad              | RMSProp              | L-BFGS            |
|---------------|----------------------|----------------------|----------------------|----------------------|-------------------|
| Learning rate | $1.0 \times 10^{-3}$ | $1.0 \times 10^{-1}$ | $1.0 \times 10^{-2}$ | $1.0 \times 10^{-2}$ | $1.0 \times 10^0$ |

Table 4: Learning rates for each update rule.

For the MNIST dataset, the architecture is presented in detail in Table 5. For Fashion-MNIST (FMNIST), the network is described in Table 6. For CIFAR10, the network architecture is described in Table 7. For the autoencoder, we use the architecture presented in Table 8. Finally, the same network architecture is used for reconstruction of FMNIST images.

| MNIST network |     |     |        |        |         |
|---------------|-----|-----|--------|--------|---------|
| Layer         | In  | Out | Kernel | Stride | Padding |
| Linear        | 784 | 500 | -      | -      | -       |
| ReLU          | 500 | 500 | -      | -      | -       |
| Dropout       | -   | -   | -      | -      | -       |
| Linear        | 500 | 10  | -      | -      | -       |
| SoftMax       | 10  | 10  | -      | -      | -       |

Table 5: Network architecture for MNIST.

| F-MNIST network |     |     |              |        |         |
|-----------------|-----|-----|--------------|--------|---------|
| Layer           | In  | Out | Kernel       | Stride | Padding |
| Conv2d          | 1   | 10  | $5 \times 5$ | 1      | None    |
| MaxPool2d       | -   | -   | $2 \times 2$ | -      | -       |
| ReLU            | -   | -   | -            | -      | -       |
| Conv2d          | 10  | 20  | $5 \times 5$ | 1      | None    |
| MaxPool2d       | 10  | 10  | $2 \times 2$ | -      | -       |
| ReLU            | -   | -   | -            | -      | -       |
| Dropout         | -   | -   | -            | -      | -       |
| Linear          | 320 | 50  | -            | -      | -       |
| Linear          | 50  | 10  | -            | -      | -       |
| LogSoftmax      | 50  | 10  | -            | -      | -       |

Table 6: Network architecture for FMNIST.

| CIFAR10 network |     |     |              |        |         |
|-----------------|-----|-----|--------------|--------|---------|
| Layer           | In  | Out | Kernel       | Stride | Padding |
| Conv2d          | 3   | 6   | $5 \times 5$ | 1      | None    |
| MaxPool2d       | -   | -   | $2 \times 2$ | -      | -       |
| ReLU            | -   | -   | -            | -      | -       |
| Conv2d          | 6   | 16  | $5 \times 5$ | 1      | None    |
| MaxPool2d       | 10  | 10  | $2 \times 2$ | -      | -       |
| ReLU            | -   | -   | -            | -      | -       |
| Linear          | 120 | 84  | -            | -      | -       |
| Linear          | 84  | 10  | -            | -      | -       |
| LogSoftmax      | 50  | 10  | -            | -      | -       |

Table 7: Network architecture for CIFAR10.

| MNIST-Autoencoder |     |     |              |        |         |
|-------------------|-----|-----|--------------|--------|---------|
| Layer             | In  | Out | Kernel       | Stride | Padding |
| Conv2d            | 1   | 8   | $3 \times 3$ | 2      | 1       |
| ReLU              | -   | -   | -            | -      | -       |
| Conv2d            | 8   | 16  | $3 \times 3$ | 2      | 1       |
| BatchNorm         | -   | -   | -            | -      | -       |
| ReLU              | -   | -   | -            | -      | -       |
| Conv2d            | 16  | 32  | $3 \times 3$ | 2      | 0       |
| Linear            | 288 | 128 | -            | -      | -       |
| ReLU              | -   | -   | -            | -      | -       |
| Linear            | 128 | 4   | -            | -      | -       |
| Linear            | 4   | 128 | -            | -      | -       |
| ReLU              | -   | -   | -            | -      | -       |
| Linear            | 128 | 288 | -            | -      | -       |
| ReLU              | -   | -   | -            | -      | -       |
| ConvTrans2d       | 32  | 16  | $3 \times 3$ | 2      | 0       |
| BatchNorm         | -   | -   | -            | -      | -       |
| ReLU              | -   | -   | -            | -      | -       |
| ConvTrans2d       | 16  | 8   | $3 \times 3$ | 2      | 1       |
| BatchNorm         | -   | -   | -            | -      | -       |
| ReLU              | -   | -   | -            | -      | -       |
| ConvTrans2d       | 8   | 1   | $3 \times 3$ | 2      | 1       |

Table 8: Network architecture for Fashion-MNIST Autoencoder operation.

## B ADDITIONAL RESULTS CIFAR10 USING RESNET50

In Fig. 8, we present the results of classification on CIFAR10 dataset using the ResNet50 architecture. Most methods are able to perform significantly well using the ResNet50 architecture. However, it is interesting to note that most first-order methods begin to over-fit the network on the dataset after roughly 20 epochs. This can be noticed when the validation accuracy deviates from the training accuracy (see Goodfellow et al. (2016)).

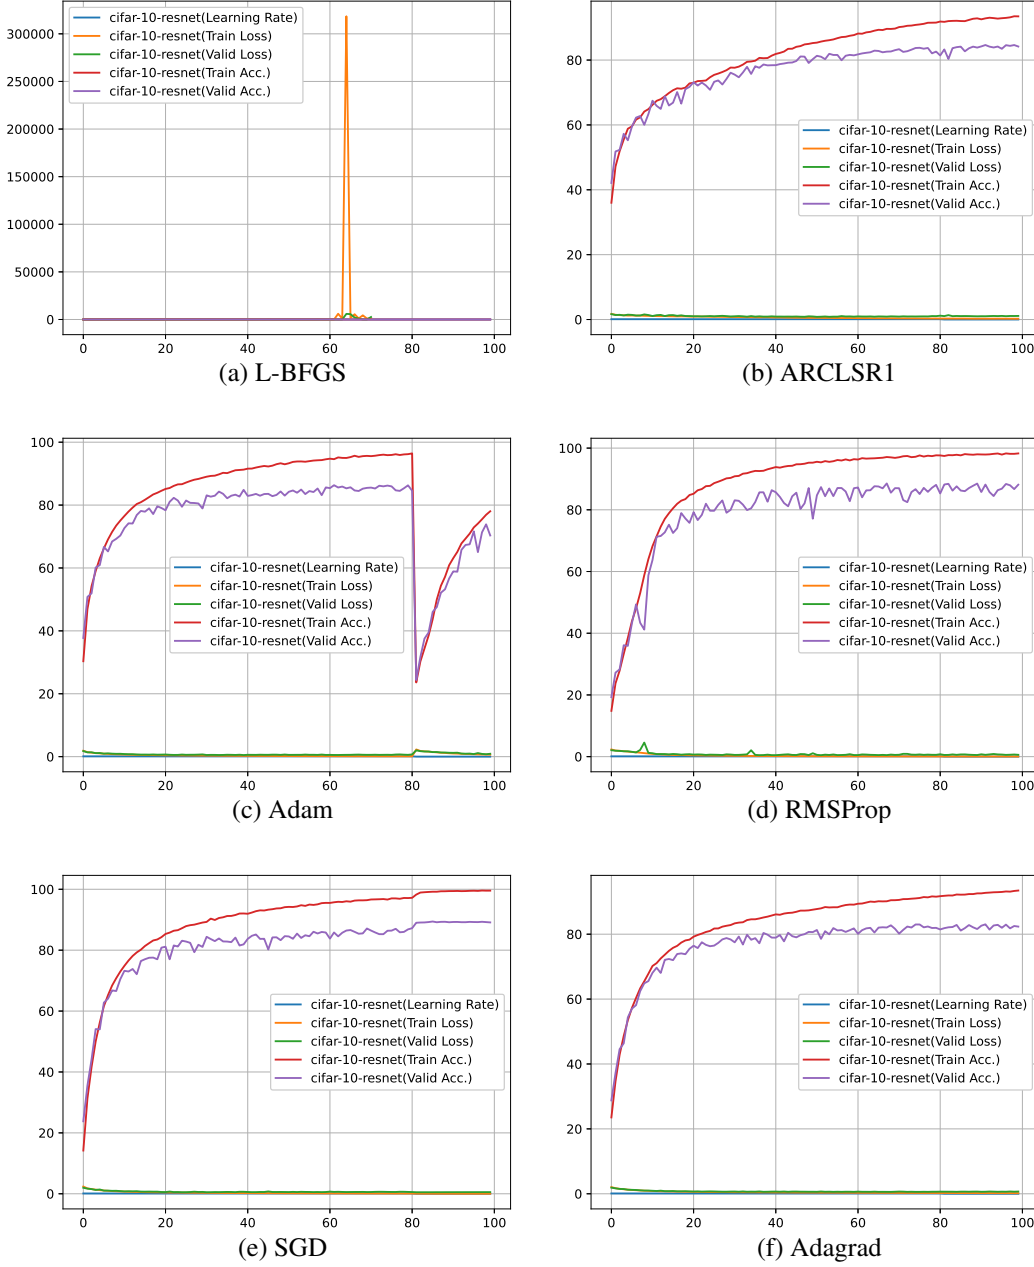

Figure 8: The  $y$ -axis represents the classification accuracy on the CIFAR10 dataset, and the  $x$ -axis represents the number of epochs. . Each algorithm was run for 100 epochs with a batch-size of 1024 images. In comparison, the ARCLSR-1 training loss tends to be closer to the validation loss, thus preventing over-fitting the network.

## C PERFORMANCE ON AUTOENCODER RECONSTRUCTION ON FMNIST

In this sections, we present the training response of the proposed approach on the Fashion-MNIST dataset (Xiao et al. (2017)). We use the same network presented in Table 8. As it can be noticed, similar to the results that we obtained from Section 5, the proposed approach is able to perform better than the adaptive methods in the first half of the first epoch. It comes as no surprise that as the batch size increases, the method performs better.

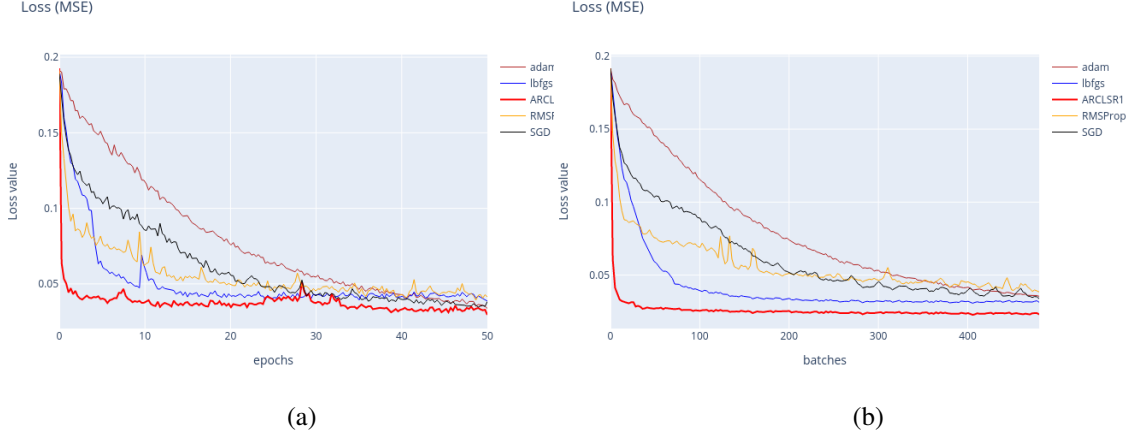

Figure 9: The testing accuracy on F-MNIST dataset.  $y$ -axis represents the Mean-Squared Error loss on the training set and  $x$ -axis represents the number of epochs/batches. (a) shows the initial training response with a batch size of 256 images. (b) shows the testing response with a batch size of 1000 images.

## D PROPOSED APPROACH PERFORMANCE ANALYSIS

We present the results obtained from using different history sizes and iterations in Figure 10 of the proposed approach on the CIFAR10 dataset using the ResNet50 architecture. **History** here refers to the number of steps ( $\mathbf{S} = [s_0 \dots s_k]$  and  $\mathbf{Y} = [y_0 \dots y_k]$  described in Sec. 2) used to approximate the Hessian. The **iter** refers to the number of iterations the proposed approach is operated to minimize the objective function over a batch.

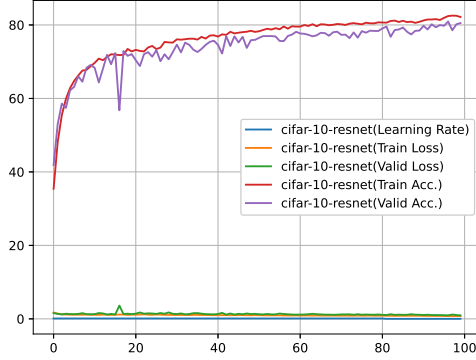

(a) History = 10, iter = 10

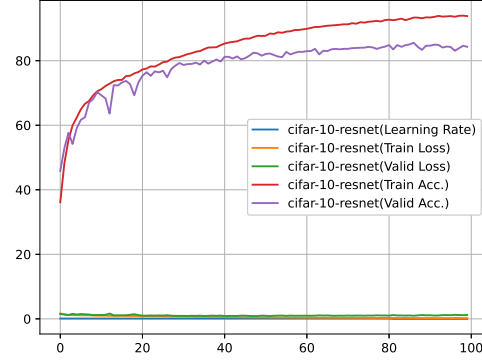

(b) History = 20, iter = 20

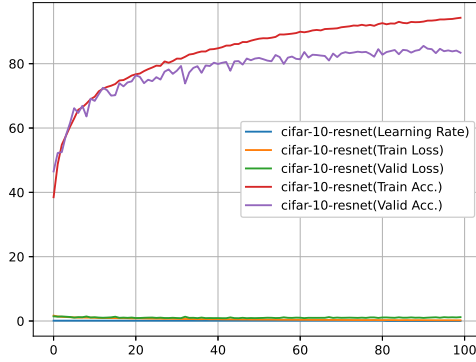

(c) History = 40, iter = 40

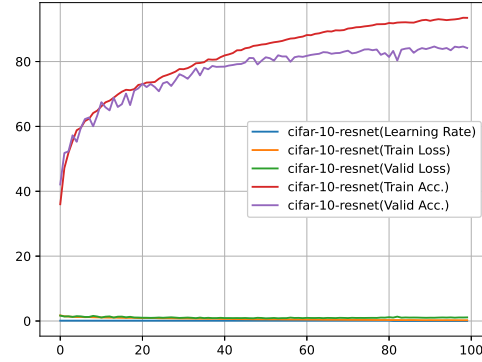

(d) History = 60, iter = 60

Figure 10: The performance of the proposed approach using different variations of history and number of iterations. The ResNet50 architecture was used with a batch size of 1024 images.
